# Supplementary material
Source: PubMed Central journal article supplement (PMC2669383)
Supplement: 0901166106_0901166106SI.pdf [file 0901166106_0901166106SI.pdf]

# Supporting Information

Gorgun et al. 10.1073/pnas.0901166106

## SI Text

**Animals, Disease Detection and Infusion of CLL Cells.** Mice were examined for lymphadenopathy and splenomegaly and at specific ages or when visibly ill, mice were killed and hematopoietic tissues including spleen, lymph nodes, bone marrow, peripheral blood, and liver were extracted. Splenic mononuclear cells were separated by ficoll-hypaque centrifugation and cells were labeled with anti-mouse CD5 PE, CD19 CYT, IgM FITC, and IgD FITC, Ig $\kappa$  FITC, and Ig $\lambda$  FITC monoclonal antibodies. Three-month-old *E $\mu$ -TCL1* mice that had not developed CLL were infused (i.v. injection) with  $50 \times 10^6$  splenic mononuclear cells ( $\geq 98\%$  CD5+CD19+Ig $\kappa$ + or Ig $\lambda$ +) in 0.5 ml PBS into the tail vein on days 0 and 3, and spleens removed at day 8. CLL cells were obtained from *E $\mu$ -TCL1* mice over 12 months of age with disease.

**Antibodies and Reagents.** Rhodamine Phalloidin, CellTracker Blue CMAC, and Alexa Fluor 488-labeled goat anti-rabbit IgG antibodies were all purchased from Invitrogen. Anti-Cdc42 and anti-Lck were from Santa Cruz Biotechnology. Anti-phosphotyrosine, clone 4G10 (FITC conjugate) was purchased from Millipore. All other reagents were purchased from Sigma unless otherwise stated.

**Gene-Chip Array and Expression-Data Analysis.** Quality control of the RNA samples was performed by spectrophotometric analysis and size fractionation (Agilent Technologies). RNA conversion of cDNA and subsequent hybridization to gene arrays was performed in the Core Facility at the Dana-Farber Cancer Institute, according to the manufacturer's protocols (Affymetrix). CEL files have been deposited into the Gene Expression Omnibus and are available with accession numbers GSE8835 for human data (<http://www.ncbi.nlm.nih.gov/geo/info/linking.html>) GSE8836 for murine data (<http://www.ncbi.nlm.nih.gov/geo/info/linking.html>).

Data were normalized using DNA-Chip Analyzer (dChip) to obtain perfect-match-only model-based expression intensities. An array with a median overall intensity was chosen as the baseline array against which other arrays were normalized at probe-intensity level. dChip was used to perform unsupervised analysis by gene filtering, excluding genes that lacked sufficient variability across groups, and hierarchical clustering of genes and samples. The filtering criteria required that a gene's coefficient of variation across all samples (after pooling replicate arrays) be between 0.9 and 2.0 and that a gene be called "present" in more than 20% of the arrays. Hierarchical clustering was performed using the distant metric 1-correlation (Pearson): that is, the distance between 2 genes is defined as  $1-r$ , where  $r$  is the Pearson correlation coefficient between the standardized expression values (mean 0 and SD 1) of the 2 genes across the samples and centroid linkage. The expression levels for each gene was standardized to mean 0 and SD 1, with the standardized expression values falling within  $[-3, +3]$ . To identify the genes whose expression patterns best distinguished groups, the permutation distribution of the maximum  $t$ -statistic was analyzed using Permax. The custom program written for R software by Robert Gray calculates Permax values and is available free on-line (<http://biowww.dfci.harvard.edu/~gray/permax.html>). For CD4 and CD8 T-cell groups, we compared gene-expression profiles using the Permax test according to cell purity ( $< 85\%$  vs.  $\geq 85\%$ ), age ( $< 12$  months old vs.  $\geq 12$  months old), CLL cell content ( $< 40\%$  vs.  $\geq 40\%$ ) and gender (female vs. male). In these supervised analyses, to control the overall error rate, the

Permax  $P$ -value was calculated by comparing the observed  $t$ -statistics for each gene from their log values to the permutation distribution of the largest  $t$ -statistic obtained over the 45,037 genes. For each gene, the  $P$ -value is the proportion of permutations with the maximum  $t$ -statistics over all genes greater or equal to the observed value for a particular gene. Differentially expressed genes (filtered by  $P \leq 0.05$  and  $1.2 < \text{fold} \leq 1.2$ ) from supervised analyses by their involvement in specific cellular pathways were determined using gene microarray pathway profiler 2.0 (GenMapp) software. Fisher  $t$ -test analysis was used to determine over-represented cellular pathways ( $P \leq 0.05$ ). The comparison of overlapping genes obtained by supervised analyses between our human gene-expression profiles (Affymetrix hu133A and mouse gene-expression profiles (Affymetrix moe430.2) was performed using RESOURCERER, a database for annotating and linking microarray resources within and cross species.

**Quantitative RT-PCR and Western Immunoblot.** Total cell protein was extracted from  $\geq 99\%$  pure splenic CD4 T or CD8 T cells and protein blots performed with primary antibodies against rabbit mouse polyclonal antibodies Lyn and PI3K (Santa Cruz Biotechnology) and then labeled with secondary antibody HRP-conjugated goat anti rabbit Ig and detected by Western blot chemiluminescence reagents (Perkin-Elmer). Expression levels normalized with  $\beta$ -Actin (Santa Cruz Biotechnology) and measured using Kodak Digital Science Image Station-440CF luminescence (Eastman Kodak).

**Immune Assessment.** For CTL effector assays, CD8 cells from WT and *E $\mu$ -TCL1* mice with and without CLL (6 animals per group) were stimulated in vitro with monocyte derived dendritic cells pulsed with Ig heavy chain- (*IgVH*) derived peptide GSAINY-APSI weekly for 4 weeks. Killing of CLL cells expressing this *IgVH* by the resulting T-cell lines was assessed at the effector:target ratios shown from WT and *E $\mu$ -TCL1* mice with and without CLL. For in vivo antigen-specific T-cell activation assays, WT and *E $\mu$ -TCL1* mice with and without CLL were immunized with gp33 peptide KAVYNFATM. On day 8 spleen cells from immunized mice (9 in each group) were stimulated with indicated concentrations of KAVYNFATM peptide in 96-well plates in triplicates. Proliferation was assayed after 3 days of treatment by [ $^3$ H]-Thymidine incorporation, measured by  $\beta$ -scintillation counter. For proliferation assays, mononuclear cells from *E $\mu$ -TCL1* mice with and without CLL were stimulated in triplicate with 100-ng/ml phorbol myristate acetate and 4- $\mu$ g/ml ionomycin for 3 days. Next, 1  $\mu$ Ci per well [ $^3$ H]-Thymidine was added to each triplicate 18 h before harvesting and proliferation measured by  $\beta$ -scintillation counter.

**Cell Conjugation Assays.** Healthy or malignant B cells ( $2 \times 10^6$  healthy WT B cells or CLL cells) were stained with CellTracker Blue CMAC (7-amino-4-chloromethylcoumarin) following the manufacturer's instructions and pulsed with or without 2  $\mu$ g/ml of a mixture of staphylococcal superantigens (SEA and SEB; Sigma) for 30 min at 37  $^{\circ}$ C. B cells were centrifuged ( $200 \times g$  for 5 min) with an equal number of T cells, incubated at 37  $^{\circ}$ C for 10 min (CD8 T cells) or 15 min (CD4 T cells). Phosphotyrosine and Lck were assessed at 5-min conjugation times, then plated (centrifuged) onto polyL-lysine-coated coverslips and fixed for 15 min at room temperature with 3% methanol-free formaldehyde in PBS.

**Immunofluorescence and Confocal Microscopy Image Acquisition.** F-actin was stained with rhodamine phalloidin (Invitrogen). CD8 T-cell conjugates formed during 5 min were stained for Lck. CD4 T-cell conjugates formed during 15 min were stained for Cdc42. Medial optical section images were captured with a Zeiss

510 confocal laser-scanning microscope using a 63 $\times$  objective. Detectors were set to detect an optimal signal below the saturation limits. Image sets to be compared were acquired during the same session and using the same acquisition settings.

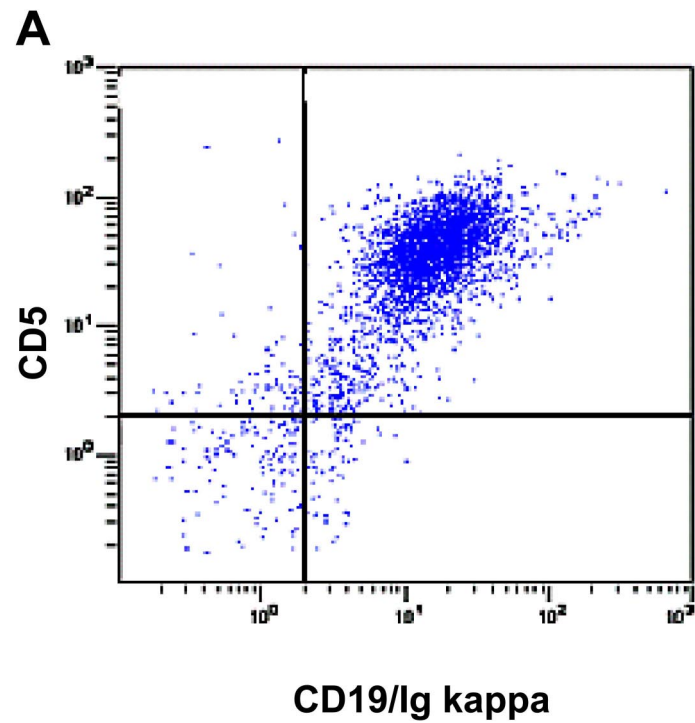

**B**

**E $\mu$ -TCL-1 mice  
with CLL**

**E $\mu$ -TCL-1 mice  
without CLL**

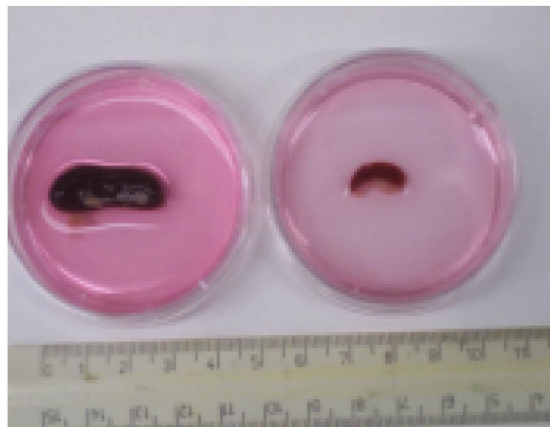

**Fig. S1.** Phenotypic characteristics of CLL cells in *E $\mu$ -TCL1* mice. (A) Development of CLL disease was demonstrated by increased CD5<sup>+</sup>CD19<sup>+</sup>Ig ( $\kappa$  or  $\lambda$ ) coexpression B cells in  $\geq$  12-month-old *E $\mu$ -TCL1* mice. Data represents phenotypic characteristics of 12 *E $\mu$ -TCL1* mice. (B) Enlargement in spleen from  $\geq$  12-month-old *E $\mu$ -TCL1* mouse with CLL compared to  $<$  12-month-old *E $\mu$ -TCL1* mouse without CLL.

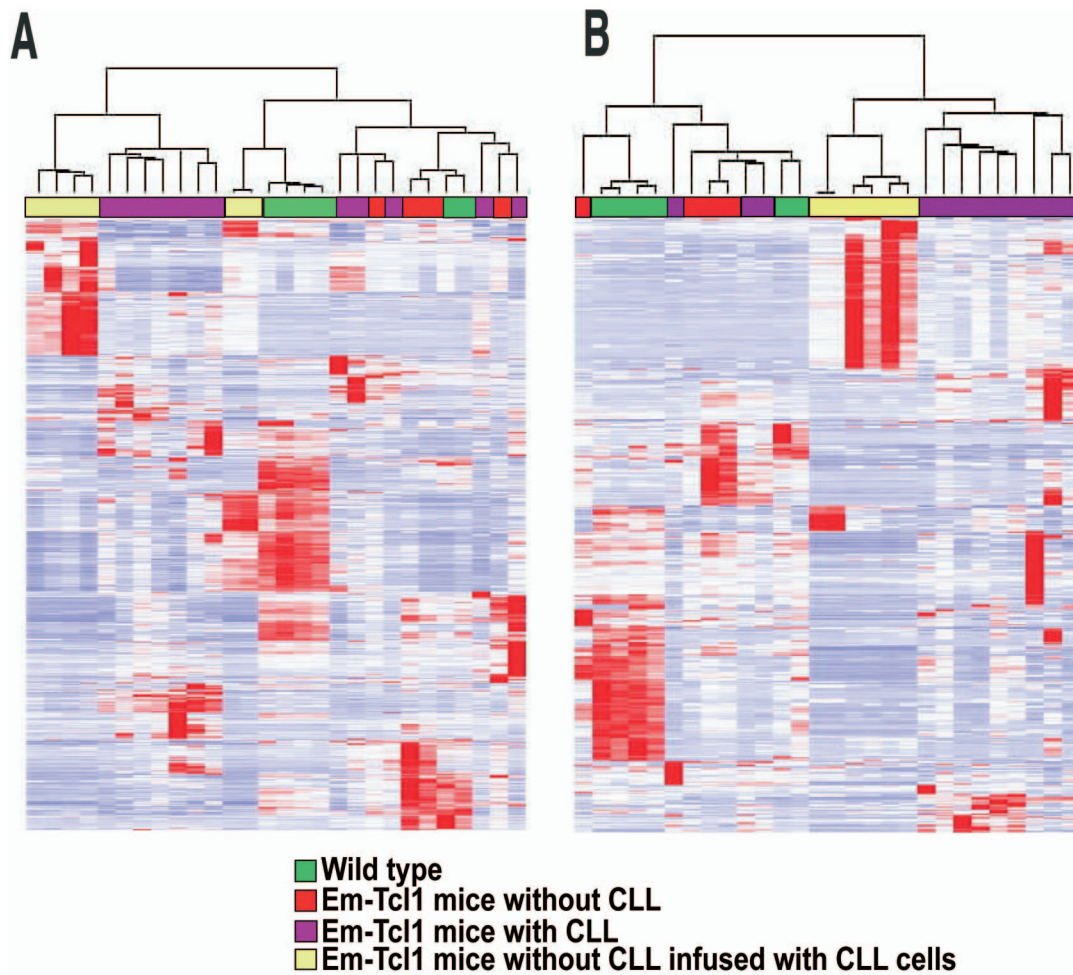

**Fig. S2.** CLL induces changes in gene-expression profiles in T cells from  $E\mu-TCL1$  mice. Hierarchical clusters of (A) CD4 T cells and (B) CD8 T cells from WT mice ( $n = 6$ ),  $E\mu-TCL1$  mice with CLL ( $n = 12$ ), or young mice infused with CLL cells ( $n = 6$ ) compared to  $E\mu-TCL1$  mice without CLL ( $n = 4$ ) using dCHIP to perform an unsupervised statistical analysis as described in *Materials and Methods*.

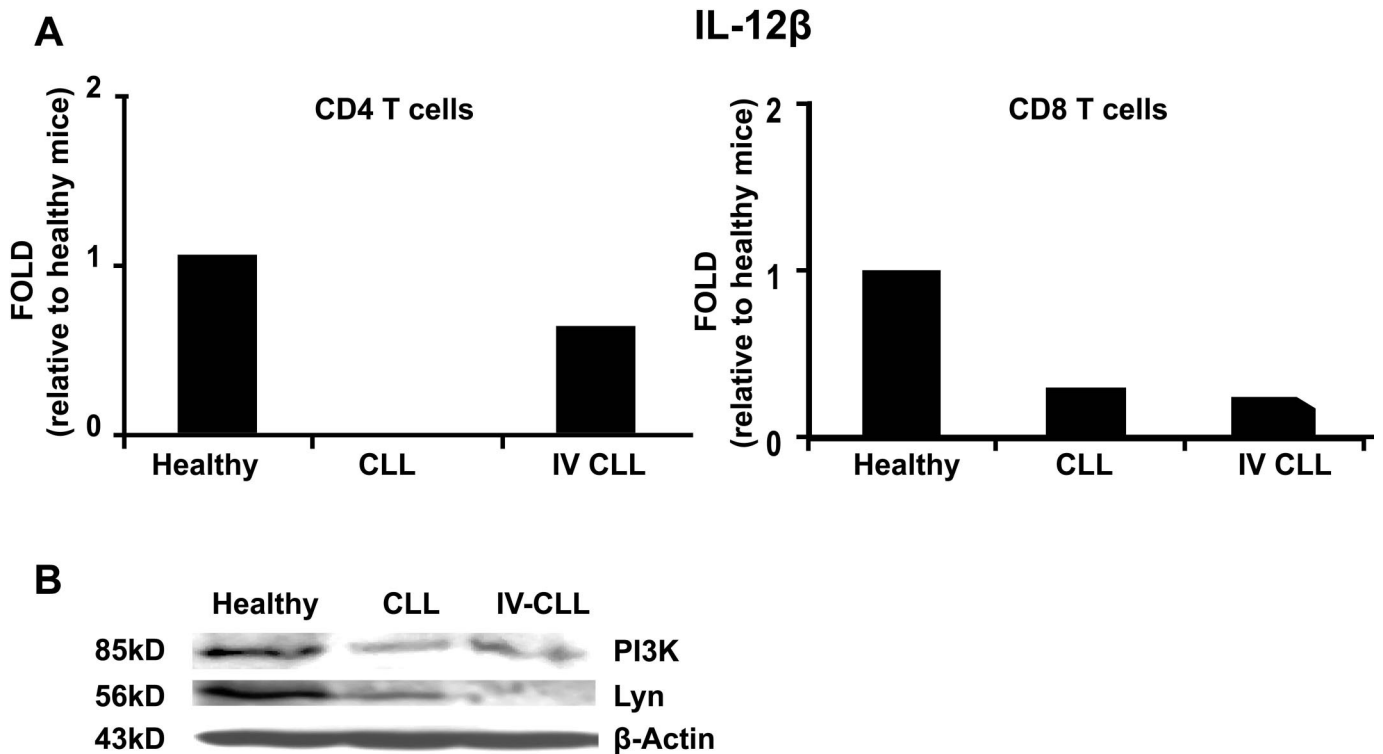

**Fig. S3.** CLL cells induce in vivo molecular and protein expression changes in CD4 and CD8 T cells from  $E\mu$ -*TCL1* mice with CLL and after infusion (i.v. injection, IV) of CLL cells in young mice. (A) Quantitative RT-PCR analysis confirmed gene-expression changes seen on the microarrays, represented here by decreased expression of *Il12 $\beta$*  in both CD4 and CD8 T cells from mice with CLL (CLL) and young mice infused with CLL cells (IV-CLL) compared to WT mice. The results represent fold-difference of the mean of triplicates relative to mean *GAPDH* expression and is representative of 3 experiments performed. (B) Western blot analysis confirmed changes in protein expression were consistent with the altered gene-expression profiles, as shown here with decreased expression of PI3K and Lyn proteins in CD4<sup>+</sup> T cells. The figure is representative of 3 independent experiments performed. (C) Immunophenotypic changes in protein expression confirmed changes in gene-expression profiling. Shown here is decreased expression of CD28 and BTLA and increased expression of CD25 and CTLA-4 in CD4 T cells from mice with CLL (*Middle*) or young mice infused with CLL (*Right*). Age-matched WT mice were used as comparative controls (*Left*). The expression levels were measured using flow cytometry as % cells/10,000 cell count. Figure plots shown are representative of 3 independent experiments.

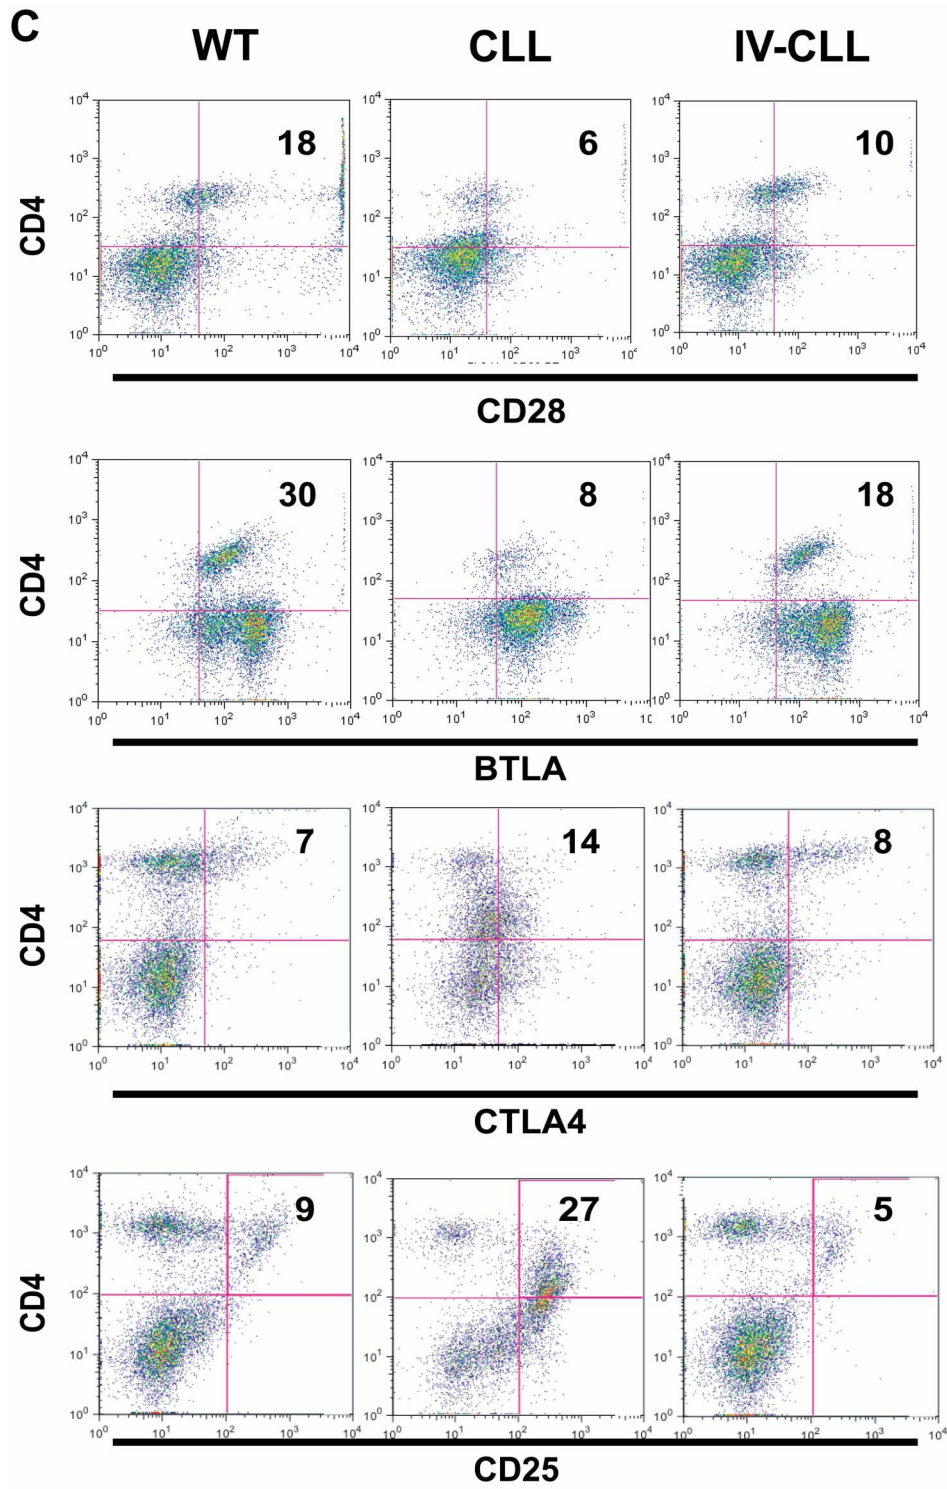

Fig. S3. continued.

**Table S1. Classification of differentially expressed genes in CD4 T cells by their involvement in specific signaling pathways**

| Pathway                                      | Probe set ID                                  | Gene name                                             | Gene symbol                                  | Fold (CLL vs. healthy) |       |
|----------------------------------------------|-----------------------------------------------|-------------------------------------------------------|----------------------------------------------|------------------------|-------|
| A. MAPK-dependent cell proliferation pathway | 1450194_a_at                                  | Myb proto-oncogene protein                            | <i>Myb</i>                                   | 1.99                   |       |
|                                              | 1419334_at                                    | Cytotoxic T lymphocyte associated protein 4           | <i>CTLA4</i>                                 | 1.26                   |       |
|                                              | 1425396_a_at                                  | Lymphocyte protein tyrosine kinase                    | <i>Lck</i>                                   | 2.91                   |       |
|                                              | 1417597_at                                    | CD28 antigen                                          | <i>CD28</i>                                  | -1.7                   |       |
|                                              | 1455656_at                                    | B and T lymphocyte attenuator                         | <i>BTLA</i>                                  | -2.13                  |       |
|                                              | 1448600_s_at                                  | Vav3 oncogene                                         | <i>Vav3</i>                                  | -1.62                  |       |
|                                              | 1437861_s_at                                  | Protein kinase C, epsilon                             | <i>Pkce</i>                                  | -1.53                  |       |
|                                              | 1420710_at                                    | Reticuloendotheliosis oncogene                        | <i>Rel</i>                                   | -3                     |       |
|                                              | 1449773_s_at                                  | Growth arrest and DNA-damage-inducible 45 beta        | <i>Gadd45b</i>                               | -1.71                  |       |
|                                              | 1451318_a_at                                  | Yamaguchi sarcoma viral (v-yes-1) oncogene homolog    | <i>Lyn</i>                                   | -1.66                  |       |
|                                              | 1416351_at                                    | Mitogen activated protein kinase kinase 1             | <i>Map2k1</i>                                | -1.37                  |       |
|                                              | 1451979_at                                    | Kirsten rat sarcoma oncogene 2                        | <i>Kras2</i>                                 | -1.47                  |       |
|                                              | 1417398_at                                    | Related RAS viral (r-ras) oncogene homolog 2          | <i>Rras2</i>                                 | -1.72                  |       |
|                                              | 1426759_at                                    | Mitogen activated protein kinase kinase kinase 3      | <i>Map3k3</i>                                | -1.75                  |       |
|                                              | 1451462_a_at                                  | Interferon (alpha and beta) receptor 2                | <i>Ifnar2</i>                                | -1.59                  |       |
|                                              | 1419169_at                                    | mitogen-activated protein kinase 6                    | <i>Mapk6</i>                                 | -4.72                  |       |
|                                              | 1422134_at                                    | FBJ osteosarcoma oncogene B                           | <i>Fosb</i>                                  | -1.98                  |       |
|                                              | 1418971_x_at                                  | B-cell leukemia/lymphoma10                            | <i>Bcl10</i>                                 | -1.77                  |       |
|                                              | 1448694_at                                    | Jun oncogene                                          | <i>Jun</i>                                   | -1.82                  |       |
|                                              | 1427705_a_at                                  | Nuclear factor kappa-b1                               | <i>Nfkb1</i>                                 | -1.4                   |       |
|                                              | Ras-dependent Th cell differentiation pathway | 1420895_at                                            | Transforming growth factor, beta receptor I  | <i>Tgfb1</i>           | -2.15 |
|                                              |                                               | 1426397_at                                            | Transforming growth factor, beta receptor II | <i>Tgfb2</i>           | -1.45 |
| 1422286_a_at                                 |                                               | Transforming growth factor B induced factor           | <i>Tgif</i>                                  | -3.2                   |       |
| 1426373_at                                   |                                               | Sloan-Kettering viral oncogene homolog                | <i>Ski</i>                                   | -1.5                   |       |
| 1422054_a_at                                 |                                               | SKI-like                                              | <i>Skil</i>                                  | -2.3                   |       |
| 1435224_at                                   |                                               | CREB binding protein                                  | <i>Crebbp</i>                                | -1.7                   |       |
| Cytokine/chemokine response pathway          | 1423389_at                                    | Mad homolog 7(Madh7)                                  | <i>Smad7</i>                                 | -2.2                   |       |
|                                              | 1423558_at                                    | Interferon gamma receptor 2                           | <i>Ifngr2</i>                                | -2                     |       |
|                                              | 1419530_at                                    | Interleukin 12b                                       | <i>Il12b</i>                                 | -3.71                  |       |
|                                              | 1460669_at                                    | Interleukin enhancer binding factor 3                 | <i>Ilf3</i>                                  | -1.59                  |       |
|                                              | 1458364_s_at                                  | Interferon alpha responsive gene                      | <i>Ifrg15</i>                                | -1.7                   |       |
|                                              | 1421174_at                                    | Interferon regulatory factor 4                        | <i>Irf4</i>                                  | -1.77                  |       |
|                                              | 1438629_x_at                                  | Granulin                                              | <i>Grn</i>                                   | -2.85                  |       |
|                                              | 1419083_at                                    | Tumor necrosis factor (ligand) superfamily, member 11 | <i>Tnfsf11</i>                               | -2.16                  |       |
| 1448710_at                                   | Chemokine (C-X-C) motif receptor 4            | <i>Cxcr4</i>                                          | -2.3                                         |                        |       |

Differentially expressed genes involved in MAPK-dependent cell proliferation and actin cytoskeletal formation, ras-dependent (Th cell differentiation) and cytokine/chemokine response pathways in CD4 T cells from E $\mu$ -*TCL1* mice with CLL or young mice infused with CLL cells compared to E $\mu$ -*TCL1* mice without CLL are represented by selected genes. Increased gene expression (+Fold) and decreased gene expression (-Fold) in T cells from CLL compared to healthy mice.

**Table S2. Classification of differentially expressed genes in CD8 T cells by their involvement in specific signaling pathways**

| Pathway                                                                                            | Probe set ID                           | Gene name                                                              | Gene symbol                                  | Fold (CLL vs healthy) |
|----------------------------------------------------------------------------------------------------|----------------------------------------|------------------------------------------------------------------------|----------------------------------------------|-----------------------|
| Vesicle-trafficking, cytoskeleton organization, intracellular transport and cell motility pathways | 1421546_a_at                           | Rac GTPase-activating protein 1                                        | <i>Racgap1</i>                               | 1.9                   |
|                                                                                                    | 1429123_at                             | Member of RAS oncogene family                                          | <i>Rab27a</i>                                | 2.4                   |
|                                                                                                    | 1449259_at                             | Member of RAS oncogene family                                          | <i>Rab3d</i>                                 | 2.1                   |
|                                                                                                    | 1433436_s_at                           | Adaptor protein complex AP-1, gamma 2 subunit                          | <i>Ap1 g2</i>                                | 1.9                   |
|                                                                                                    | 1422593_at                             | Adaptor-related protein complex 3, sigma 1 subunit                     | <i>Ap3 s1</i>                                | 1.8                   |
|                                                                                                    | 1415698_at                             | Golgi phosphoprotein 2                                                 | <i>Golph2</i>                                | 1.5                   |
|                                                                                                    | 1430522_a_at                           | Vesicle-associated membrane protein 5                                  | <i>Vamp5</i>                                 | 1.4                   |
|                                                                                                    | 1416082_at                             | Member of RAS oncogene family                                          | <i>Rab1</i>                                  | -1.5                  |
|                                                                                                    | 1423083_at                             | Member of RAS oncogene family                                          | <i>Rab33b</i>                                | -1.8                  |
|                                                                                                    | 1417622_at                             | Solute carrier 12 member 2                                             | <i>Slc12a2</i>                               | -2.0                  |
|                                                                                                    | 1416465_a_at                           | Vesicle-associated membrane protein-associated protein A               | <i>Vapa</i>                                  | -1.5                  |
|                                                                                                    | 1451979_at                             | Kirsten rat sarcoma oncogene 2                                         | <i>Kras2</i>                                 | -1.5                  |
|                                                                                                    | 1435807_at                             | Cell division cycle 42                                                 | <i>Cdc42</i>                                 | -1.6                  |
|                                                                                                    | 1460419_a_at                           | Protein kinase C, beta                                                 | <i>Pkcb</i>                                  | -1.5                  |
|                                                                                                    | 1421291_at                             | Interleukin 18 receptor accessory protein                              | <i>Il18rap</i>                               | 1.9                   |
|                                                                                                    | 1421188_at                             | Chemokine (C-C) receptor 2                                             | <i>Ccr2</i>                                  | 1.9                   |
|                                                                                                    | 1424244_at                             | Intercellular adhesion molecule                                        | <i>Icam1</i>                                 | 1.5                   |
|                                                                                                    | 1417932_at                             | Interleukin 18                                                         | <i>Il18</i>                                  | -2.7                  |
|                                                                                                    | 1429559_at                             | Guanine nucleotide binding protein alpha q polypeptide                 | <i>Gnaq</i>                                  | -2.1                  |
|                                                                                                    | Cytokine-Chemokine regulation pathways | 1422555_s_at                                                           | Guanine nucleotide binding protein, alpha 13 | <i>Gna13</i>          |
| 1417379_at                                                                                         |                                        | IQ motif containing GTPase activating protein 1                        | <i>Iqgap1</i>                                | -1.4                  |
| 1460352_s_at                                                                                       |                                        | Phosphatidylinositol 3 kinase, regulatory subunit, polypeptide 4, p150 | <i>Pik3r4</i>                                | -1.9                  |
| 1421023_at                                                                                         |                                        | Phosphatidylinositol 3-kinase, C2 domain containing, alpha polypeptide | <i>Pik3c2a</i>                               | -1.8                  |
| 1419279_at                                                                                         |                                        | Phosphatidylinositol-4-phosphate 5-kinase, type II, alpha              | <i>Pip5k2a</i>                               | -1.5                  |
| 1423182_at                                                                                         |                                        | Tumor necrosis factor receptor superfamily, member 13b                 | <i>Tnfrsf13b</i>                             | -2.3                  |
| 1415989_at                                                                                         |                                        | Vascular cell adhesion molecule 1                                      | <i>Vcam1</i>                                 | -3.2                  |
| 1419128_at                                                                                         |                                        | Integrin alpha X                                                       | <i>Itgax</i>                                 | -1.7                  |
| 1419530_at                                                                                         |                                        | Interleukin 12b                                                        | <i>Il12b</i>                                 | -7.9                  |
| 1418718_at                                                                                         |                                        | Chemokine (C-X-C motif) ligand 16                                      | <i>Cxcl16</i>                                | -2.4                  |
| 1418652_at                                                                                         | Chemokine (C-X-C motif) ligand 9       | <i>Cxcl9</i>                                                           | -2.3                                         |                       |

Differentially expressed genes involved in cytoskeleton organization, vesicle trafficking, intracellular transport, cell motility and cytokine-chemokine regulation pathways in CD8 T cells from *Eμ-TCL1* mice with CLL or young mice infused with CLL cells compared to *Eμ-TCL1* mice without CLL are represented by selected genes. Comparison of expression levels between *Eμ-TCL1* mice with CLL, young mice infused with CLL cells, and *Eμ-TCL1* mice without CLL were detected using a supervised analysis ( $P \leq 0.05$ ). Increased gene expression (+Fold) and decreased gene expression (-Fold) in T cells from CLL compared to healthy mice.



**Table S3. Characteristics of mice used for the gene-expression profiling studies**

| Mice      |                               |                                                       | Gender |        | Age, month | Tumor cells, % | T cell purity, % |
|-----------|-------------------------------|-------------------------------------------------------|--------|--------|------------|----------------|------------------|
| Wild type | <i>E<math>\mu</math>-TCL1</i> | <i>E<math>\mu</math>-TCL1</i> injected with CLL cells | Male   | Female |            |                |                  |
| 6         | 16                            | 6                                                     | 12     | 16     | 3–18.5     | 10–93          | 66–99            |

*TCL1* gene transgenic B6C3 mice (*E $\mu$ -TCL1*) ( $n = 16$ ) were examined for lymphadenopathy and splenomegaly to detect for CLL development. At different ages (3–18.5 months old) and visibly ill, mice were killed to obtain hematopoietic tissues, including spleen, lymph nodes, bone marrow, peripheral blood, and liver. To analyze the in vivo impact of CLL cells on T cells, *E $\mu$ -TCL1* mice without CLL ( $n = 6$ ) were infused (intravenous injection) with splenic mononuclear cells with a high number of CLL cells ( $\geq 98\%$  CD5<sup>+</sup>CD19<sup>+</sup>Ig light chain<sup>+</sup> B cells). Confirmation that no CLL was seen in young mice was assessed by immunophenotyping of peripheral blood samples. Age-matched WT (B6C3) mice ( $n = 6$ ) were used as controls.
